# Supplementary material
Source: PubMed Central journal article supplement (PMC8259803)

# Revised Transactional Model of Occupational Stress and Coping

Adapted from Goh, Sawang, and Oei (2010) and applied to trauma patient care

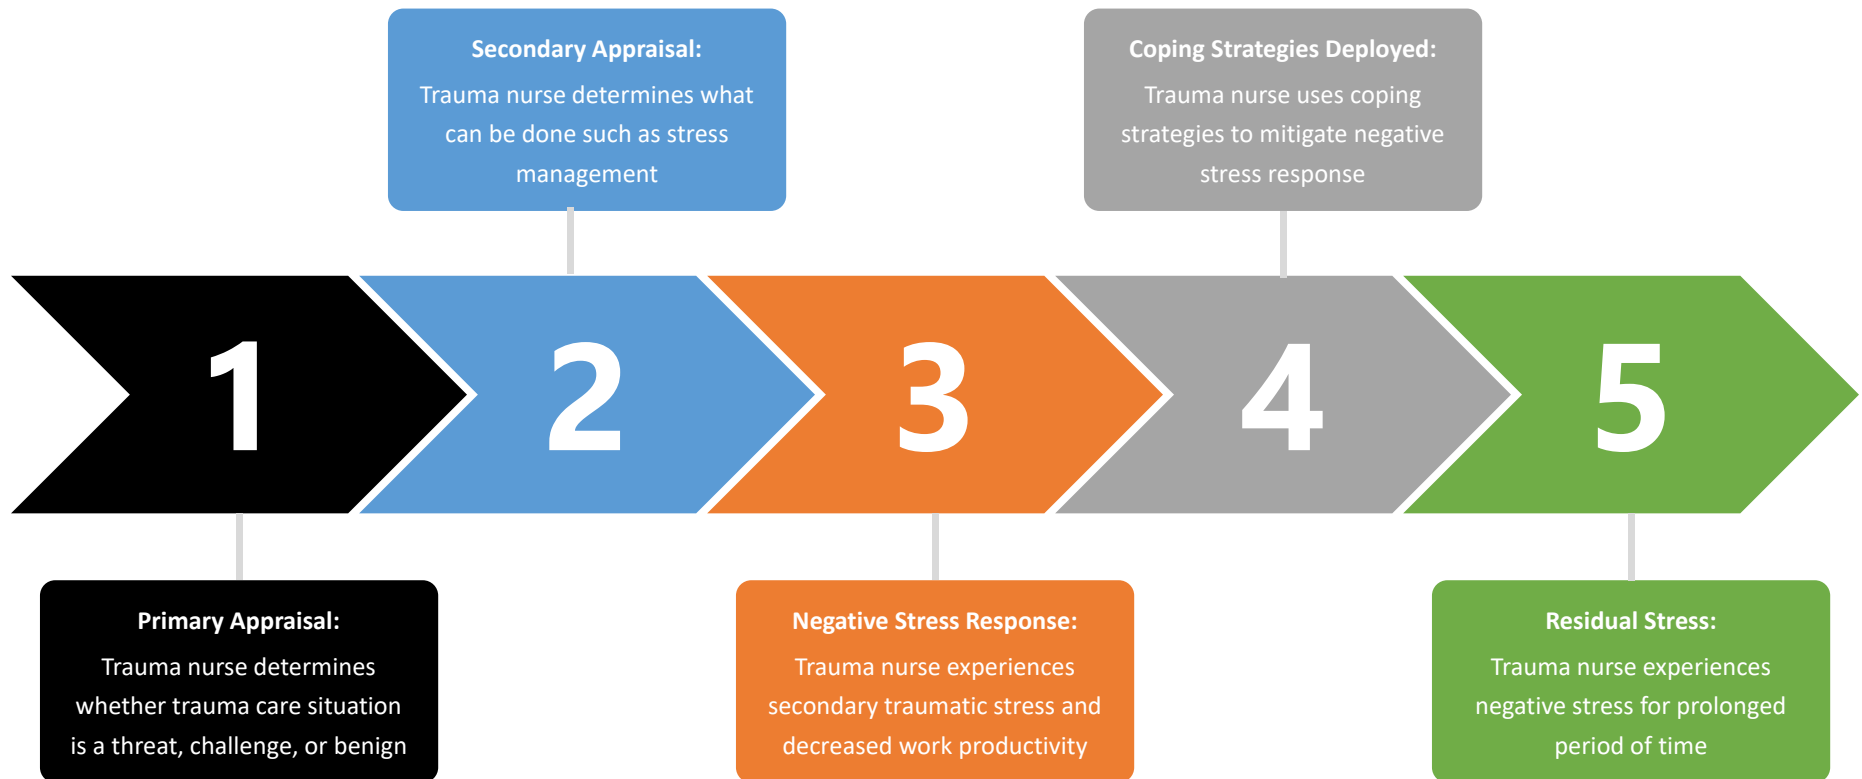

Supplement: NIHMS1700078-supplement-SDC_1.pdf [file NIHMS1700078-supplement-SDC_1.pdf]
